# Supplementary material for: Efficacy and safety of carfilzomib in relapsed and/or refractory multiple myeloma: systematic review and meta-analysis of 14 trials
Source: PubMed Central journal article supplement (PMC5955098; doi:10.18632/oncotarget.25281), 2018-05-04
Supplement: oncotarget-09-23704-s001.pdf [file oncotarget-09-23704-s001.pdf]

## **Efficacy and safety of carfilzomib in relapsed and/or refractory multiple myeloma: systematic review and meta-analysis of 14 trials**

### **SUPPLEMENTARY MATERIALS**

**Supplementary Table 1: Cumulative incidence of common high-grade adverse events with subgroup analysis based on Carf dose and type of regimen based on selected clinical trials done in RRMM patients. See Supplementary\_Table\_1**
